# Supplementary material
Source: publisher figshare collection journal article supplement (https://acs.figshare.com/ndownloader/files/11021252)
Supplement: Supplementary file 1 [file 11021252]

**Methotrexate-loaded extracellular vesicles functionalized with therapeutic  
and targeted peptides for the treatment of glioblastoma multiforme**

*Zhilan Ye<sup>1,2,#</sup>, Tao Zhang<sup>1, #</sup>, Wenshan He<sup>3</sup>, Honglin Jin<sup>1</sup>, Cuiwei Liu<sup>1</sup>, Zhe Yang<sup>4</sup>, Jinghua Ren<sup>1, \*</sup>*

<sup>1</sup> Cancer center, Union Hospital, Tongji Medical College of Huazhong University of Science and Technology, Wuhan, China 430022

<sup>2</sup> Research Center for Tissue Engineering and Regenerative Medicine, Union Hospital, Tongji Medical College of Huazhong University of Science and Technology, Wuhan, China 430022

<sup>3</sup> Department of Breast and Thyroid Surgery, Union Hospital, Tongji Medical College of Huazhong University of Science and Technology, Wuhan, China 430022

<sup>4</sup> Hubei Collaborative Innovation Center for Advanced Organic Chemical Materials; Ministry of Education Key Laboratory for the Green Preparation and Application of Functional Materials, Hubei University, Wuhan, China 430022

#These authors contribute equally to this work

\*Correspondence to: Jinghua Ren, [jhrenmed@hust.edu.cn](mailto:jhrenmed@hust.edu.cn)

## Supplementary Information

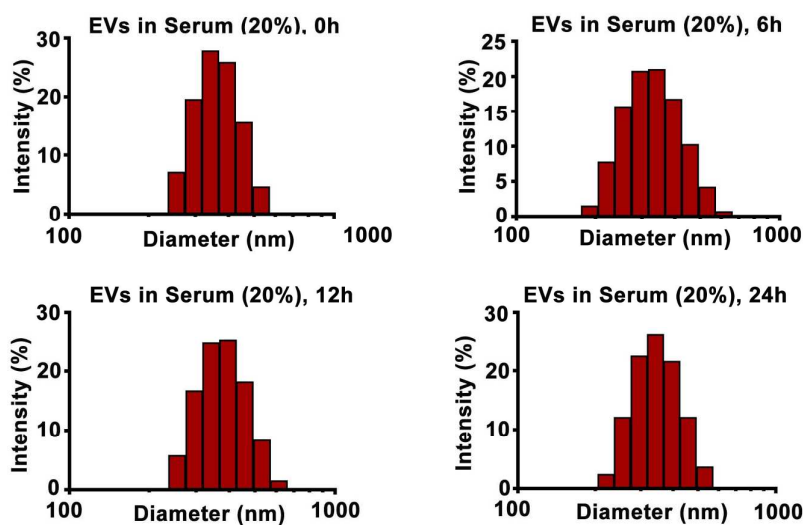

**Figure S1.** Size distribution of MTX@EVs-KLA-LDL in PBS containing 20% serum at different times (0h, 6h, 12h, 24h).

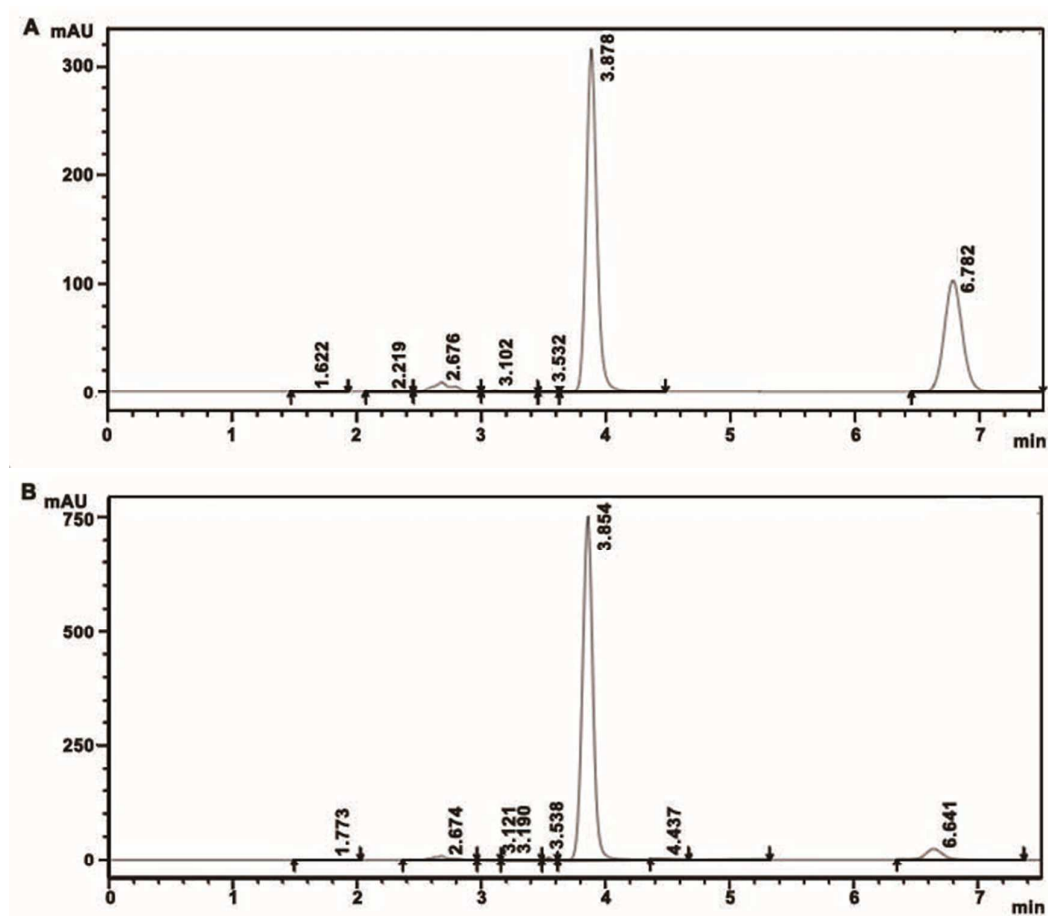

**Figure S2.** The amount of MTX encapsulated into EVs was measured by HPLC. The typical HPLC profile for MTX extracted from EVs (B) and MTX standards (A) are

shown here.

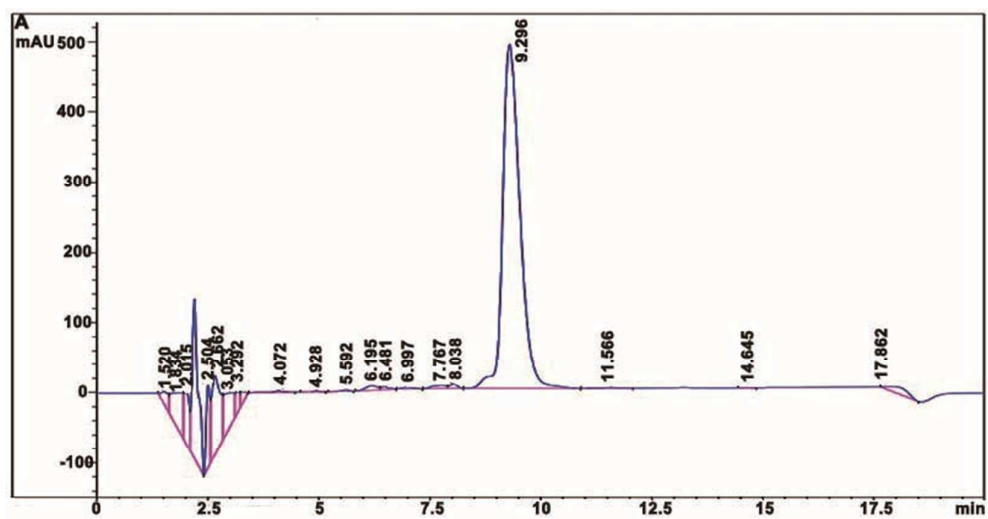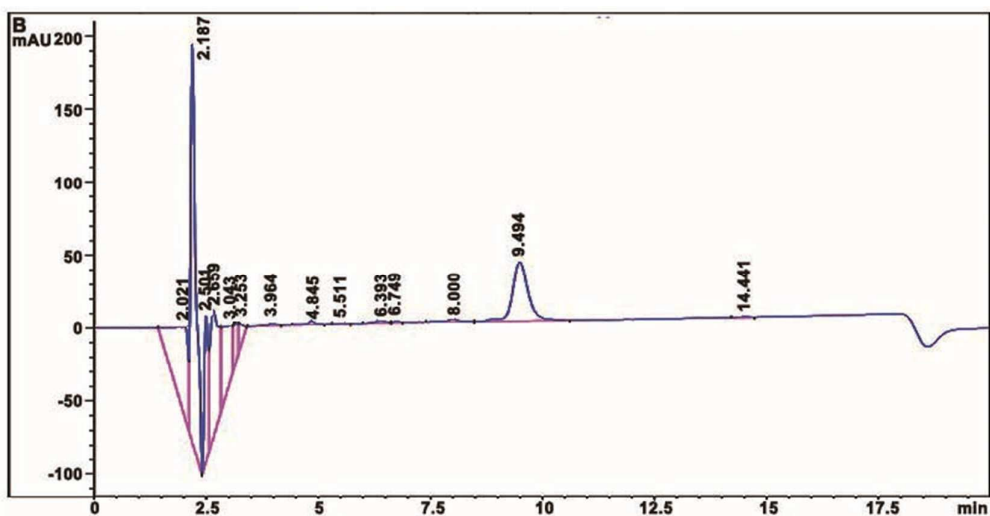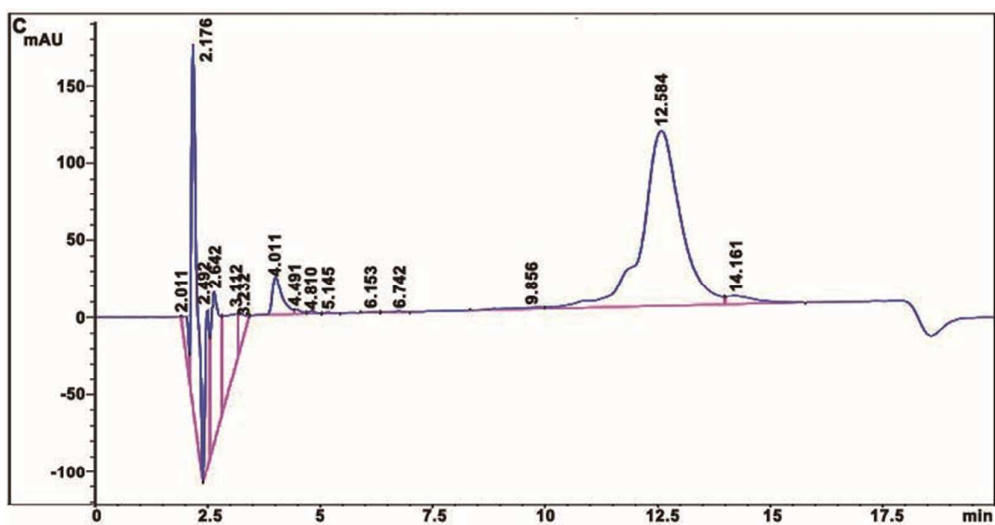

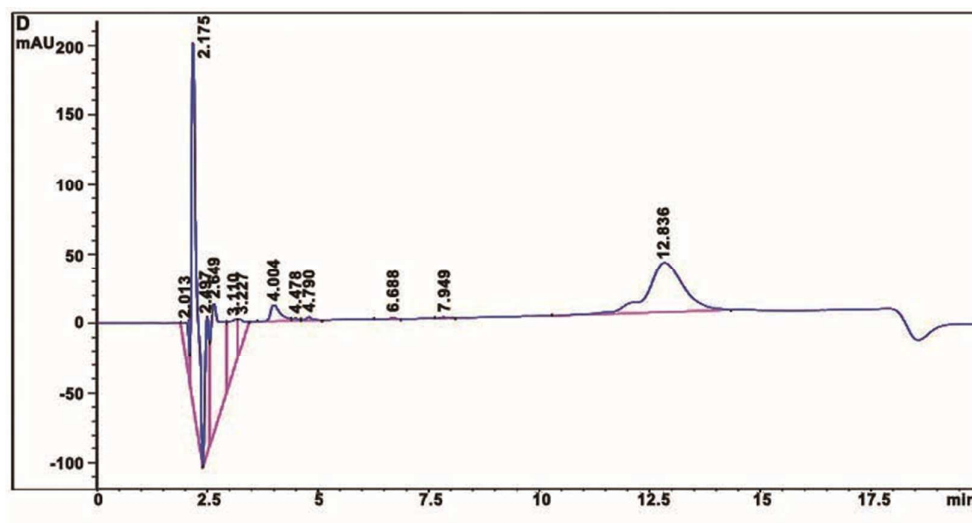

**Figure S3.** The amount of peptide LDL (A, B) or KLA-LDL (C, D) was assessed by HPLC. The typical HPLC profile for free peptide collected from supernatant (B, D) and peptide standards (A, C) are shown here.
